# Supplementary material
Source: PubMed Central journal article supplement (PMC3781409)
Supplement: supp_113.207522_JPET207522_Supplemental_Tables.pdf [file supp_113.207522_JPET207522_Supplemental_Tables.pdf]

**STIMULANTS AS SPECIFIC INDUCERS OF DOPAMINE-INDEPENDENT SIGMA AGONIST SELF-  
ADMINISTRATION IN RATS**

Takato Hiranita, Paul L. Soto, Gianluigi Tanda, Theresa A. Kopajtic and Jonathan L. Katz

Psychobiology Section, Molecular Targets and Medications Discovery Branch, Intramural Research Program, Department of Health and Human Services, National Institute on Drug Abuse, National Institutes of Health, Baltimore, MD 21224 (TH, GT, TAK, JLK)  
Behavioral Biology Research Center, 5510 Nathan Shock Drive, Suite 3000, Johns Hopkins University School of Medicine, Baltimore, MD 21224-6823 (PLS)

JPET #207522

## TABLES

Table 1: Statistical analyses of dose-effect curves of various compounds compared to saline availability as shown in the Figure 2a-c.

| Treatment                                                        | Drug                               | Dose                              | Interaction                     | Post-hoc test                                                                                     |
|------------------------------------------------------------------|------------------------------------|-----------------------------------|---------------------------------|---------------------------------------------------------------------------------------------------|
| <i>d</i> -Methamphetamine vs. saline substitution                | $F_{1,20}=30.5$ ;<br>$p=0.003$     | $F_{4,20}=26.4$ ;<br>$p<0.001$    | $F_{4,20}=32.0$ ;<br>$p<0.001$  | 0.032 mg/kg/inj, $t=3.28$ , $p=0.004$ ,<br>0.10 mg/kg/inj, $t=7.65$ , $p<0.001$                   |
| PRE-084 vs. saline substitution                                  | $F_{1,20}=6.10$ ;<br>$p=0.057$     | $F_{4,20}=5.05$ ;<br>$p=0.006$    | $F_{4,20}=5.43$ ;<br>$p=0.004$  | 0.1 mg/kg/inj, $t=2.55$ , $p=0.019$ ,<br>0.32 mg/kg/inj, $t=4.66$ , $p<0.001$                     |
| (+)-Pentazocine vs. saline substitution                          | $F_{1,20}=15.6$ ;<br>$p=0.011$     | $F_{4,20}=13.8$ ;<br>$p<0.001$    | $F_{4,20}=15.1$ ;<br>$p<0.001$  | 0.1 mg/kg/inj, $t=3.33$ , $p=0.003$ ,<br>0.32 mg/kg/inj, $t=8.02$ , $p<0.001$                     |
| <i>d</i> -Amphetamine vs. saline substitution                    | $F_{1,20}=24.8$ ;<br>$p=0.004$     | $F_{4,20}=18.3$ ;<br>$p<0.001$    | $F_{4,20}=20.1$ ;<br>$p<0.001$  | 0.032 mg/kg/inj, $t=4.54$ , $p<0.001$ ,<br>0.10 mg/kg/inj, $t=9.24$ , $p<0.001$                   |
| BD 1008 vs. saline substitution                                  | $F_{1,20}=7.12$ ;<br>$p=0.044$     | $F_{4,20}=0.859$ ;<br>; $p=0.505$ | $F_{4,20}=0.255$ ;<br>$p=0.903$ | 0.032 mg/kg/inj, $t=2.13$ , $p=0.043$                                                             |
| (+)-Butaclamol vs. saline substitution                           | $F_{1,20}=1.58$ ;<br>$p=0.264$     | $F_{4,20}=0.038$<br>3; $p=0.997$  | $F_{4,20}=0.552$ ;<br>$p=0.700$ | N.S.                                                                                              |
| Naltrexone vs. saline substitution                               | $F_{1,20}=6.10$ ;<br>$p=0.057$     | $F_{4,20}=0.400$ ;<br>; $p=0.806$ | $F_{4,20}=0.474$ ;<br>$p=0.755$ | N.S.                                                                                              |
| Heroin vs. saline substitution                                   | $F_{1,20}=28.3$ ;<br>$p=0.003$     | $F_{4,20}=25.0$ ;<br>$p<0.001$    | $F_{4,20}=35.1$ ;<br>$p<0.001$  | 3.2 $\mu$ g/kg/injection, $t=6.66$ , $p<0.001$ ,<br>10 $\mu$ g/kg/injection, $t=10.6$ , $p<0.001$ |
| PRE-084 (0.032-1.0 mg/kg/inj) vs. saline substitution            | $F_{1,20}=0.0224$ ;<br>; $p=0.887$ | $F_{4,20}=8.20$ ;<br>$p<0.001$    | $F_{4,20}=5.21$ ;<br>$p=0.005$  | N.S.                                                                                              |
| PRE-084 substitution (0.32-10 mg/kg/inj) vs. saline substitution | $F_{1,20}=0.0016$<br>0; $p=0.970$  | $F_{4,20}=10.1$ ;<br>$p<0.001$    | $F_{4,20}=5.27$ ;<br>$p=0.005$  | 3.2 mg/kg/inj, $t=2.32$ , $p=0.031$ ,<br>10 mg/kg/inj, $t=2.61$ , $p=0.016$                       |
| (+)-Pentazocine (0.032-1.0 mg/kg/inj) vs. saline substitution    | $F_{1,20}=0.248$ ;<br>$p=0.640$    | $F_{4,20}=8.19$ ;<br>$p<0.001$    | $F_{4,20}=3.70$ ;<br>$p=0.021$  | 0.1 mg/kg/injection, $t=2.76$ , $p=0.011$                                                         |
| (+)-Pentazocine (0.32-10 mg/kg/inj) vs. saline substitution      | $F_{1,20}=0.354$ ;<br>$p=0.578$    | $F_{4,20}=6.23$ ;<br>$p=0.002$    | $F_{4,20}=14.6$ ;<br>$p<0.001$  | 0.32 mg/kg/inj, $t=3.74$ , $p=0.001$ ,<br>1.0 mg/kg/inj, $t=4.23$ , $p<0.001$ ,                   |

|                                                               |                                        |                                     |                                     |                                                                                                      |
|---------------------------------------------------------------|----------------------------------------|-------------------------------------|-------------------------------------|------------------------------------------------------------------------------------------------------|
|                                                               |                                        |                                     |                                     | 0 mg/kg/inj, t=3.45, p=0.003                                                                         |
| Remifentanil vs. saline substitution                          | F <sub>1,20</sub> =13.4;<br>p=0.015    | F <sub>4,20</sub> =9.77;<br>p<0.001 | F <sub>4,20</sub> =9.96;<br>p<0.001 | 0.32 µg/kg/inj, t=3.71, p=0.001,<br>1.0 µg/kg/inj, t=6.37, p<0.001                                   |
| BD 1008 vs. saline substitution                               | F <sub>1,20</sub> =0.0271<br>; p=0.876 | F <sub>4,20</sub> =2.98;<br>p=0.044 | F <sub>4,20</sub> =6.19;<br>p=0.002 | 0.32 mg/kg/inj, t=2.73, p=0.012,<br>1.0 mg/kg/inj, t=3.18, p=0.004                                   |
| (+)-Butaclamol vs. saline substitution                        | F <sub>1,20</sub> =0.0823<br>; p=0.786 | F <sub>4,20</sub> =2.79;<br>p=0.055 | F <sub>4,20</sub> =8.62;<br>p<0.001 | 0.1 µg/kg/inj, t=2.72, p=0.013,<br>1.0 µg/kg/inj, t=2.31, p=0.031,<br>3.2 µg/kg/inj, t=3.19, p=0.004 |
| Naltrexone vs. saline substitution                            | F <sub>1,20</sub> =0.177;<br>p=0.692   | F <sub>4,20</sub> =4.57;<br>p=0.009 | F <sub>4,20</sub> =12.0;<br>p<0.001 | 0.32 mg/kg/inj, t=2.78, p=0.019,<br>1.0 mg/kg/inj, t=3.20, p=0.009                                   |
| Ketamine vs. saline substitution                              | F <sub>1,20</sub> =15.9;<br>p=0.011    | F <sub>4,20</sub> =11.9;<br>p<0.001 | F <sub>4,20</sub> =12.3;<br>p<0.001 | 0.1 mg/kg/inj, t=3.51, p=0.002,<br>0.32 mg/kg/inj, t=7.40, p<0.001                                   |
| PRE-084 (0.032-1.0 mg/kg/inj) vs. saline substitution         | F <sub>1,20</sub> =6.19;<br>p=0.055    | F <sub>4,20</sub> =2.48;<br>p=0.077 | F <sub>4,20</sub> =6.74;<br>p=0.001 | 0.32 mg/kg/inj, t=5.34, p<0.001                                                                      |
| PRE-084 (0.32-10 mg/kg/inj) vs. saline substitution           | F <sub>1,20</sub> =3.64;<br>p=0.115    | F <sub>4,20</sub> =4.55;<br>p=0.009 | F <sub>4,20</sub> =2.38;<br>p=0.086 | 1.0 mg/kg/inj, t=2.44, p=0.023                                                                       |
| (+)-Pentazocine (0.032-1.0 mg/kg/inj) vs. saline substitution | F <sub>1,20</sub> =2.26;<br>p=0.193    | F <sub>4,20</sub> =1.28;<br>p=0.310 | F <sub>4,20</sub> =1.63;<br>p=0.205 | N.S.                                                                                                 |
| (+)-Pentazocine (0.32-10 mg/kg/inj) vs. saline substitution   | F <sub>1,20</sub> =2.47;<br>p=0.177    | F <sub>4,20</sub> =1.54;<br>p=0.230 | F <sub>4,20</sub> =2.46;<br>p=0.079 | N.S.                                                                                                 |
| (+)-MK 801 vs. saline substitution                            | F <sub>1,20</sub> =27.2;<br>p=0.003    | F <sub>4,20</sub> =22.4;<br>p<0.001 | F <sub>4,20</sub> =34.7;<br>p<0.001 | 1.0 µg/kg/inj, t=6.76, p<0.001,<br>3.2 µg/kg/inj, t=10.1, p<0.001,<br>10 µg/kg/inj, t=2.28, p=0.038  |
| BD 1008 vs. saline substitution                               | F <sub>1,20</sub> =1.52;<br>p=0.272    | F <sub>4,20</sub> =7.06;<br>p=0.001 | F <sub>4,20</sub> =1.54;<br>p=0.229 | 0.32 mg/kg/inj, t=2.44, p=0.026                                                                      |
| (+)-Butaclamol vs. saline substitution                        | F <sub>1,20</sub> =3.03;<br>p=0.142    | F <sub>4,20</sub> =4.67;<br>p=0.008 | F <sub>4,20</sub> =8.02;<br>p<0.001 | 0 µg/kg/inj, t=2.72, p=0.012,<br>0.1 µg/kg/inj, t=2.31, p=0.031,<br>1.0 µg/kg/inj, t=2.64, p=0.015,  |

|                                    |                                     |                                     |                                     |                                                                 |
|------------------------------------|-------------------------------------|-------------------------------------|-------------------------------------|-----------------------------------------------------------------|
|                                    |                                     |                                     |                                     | 3.2 µg/kg/inj, t=3.36, p=0.003                                  |
| Naltrexone vs. saline substitution | F <sub>1,20</sub> =4.28;<br>p=0.093 | F <sub>4,20</sub> =3.69;<br>p=0.021 | F <sub>4,20</sub> =2.07;<br>p=0.123 | 0 mg/kg/inj, t=2.30, p=0.031,<br>0.1 mg/kg/inj, t=2.19, p=0.038 |

N.S. non-significant

Table 2: Statistical analyses of effects of BD 1008, (+)-butaclamol, or naltrexone on self-administration of *d*-methamphetamine, heroin, ketamine, and PRE-084 substitution for *d*-methamphetamine as shown in Figures 3-4.

| Treatment                                                                                           | Self-Administered Drug Dose      | Antagonist Dose (i.p.)           | Interaction                        | Post-hoc test                                                                                                                                                                                                                                                                                                                                                                                                                                                                         |
|-----------------------------------------------------------------------------------------------------|----------------------------------|----------------------------------|------------------------------------|---------------------------------------------------------------------------------------------------------------------------------------------------------------------------------------------------------------------------------------------------------------------------------------------------------------------------------------------------------------------------------------------------------------------------------------------------------------------------------------|
| (+)-Butaclamol (i.p.) before <i>d</i> -methamphetamine self-administration                          | F <sub>4,80</sub> =31.3; p<0.001 | F <sub>4,80</sub> =30.5; p<0.001 | F <sub>16,80</sub> =31.2; p<0.001  | 3.2 µg/kg (i.p.) at 0.032 mg/kg/inj, t=7.19, p<0.001, 10 µg/kg (i.p.) at 0.032 mg/kg/inj, t=6.86, p<0.001, 32 µg/kg (i.p.) at 0.032 mg/kg/inj, t=7.02, p<0.001, 3.2 µg/kg (i.p.) at 0.1 mg/kg/inj, t=5.18, p<0.001, 10 µg/kg (i.p.) at 0.1 mg/kg/inj, t=10.8, p<0.001, 32 µg/kg (i.p.) at 0.1 mg/kg/inj, t=11.3, p<0.001, 3.2 µg/kg (i.p.) at 0.32 mg/kg/inj, t=11.3, p<0.001, 10 µg/kg (i.p.) at 0.32 mg/kg/inj, t=6.03, p<0.001, 32 µg/kg (i.p.) at 0.32 mg/kg/inj, t=2.93, p=0.043 |
| BD 1008 (i.p.) before <i>d</i> -methamphetamine self-administration                                 | F <sub>4,80</sub> =36.2; p<0.001 | F <sub>4,80</sub> =3.38; p=0.029 | F <sub>16,80</sub> =2.44; p=0.005  | N.S. (vs. Vehicle, i.p.)                                                                                                                                                                                                                                                                                                                                                                                                                                                              |
| Naltrexone (i.p.) before <i>d</i> -methamphetamine self-administration                              | F <sub>4,60</sub> =34.9; p<0.001 | F <sub>3,60</sub> =1.28; p=0.317 | F <sub>12,60</sub> =0.776; p=0.673 | N.S. (vs. Vehicle, i.p.)                                                                                                                                                                                                                                                                                                                                                                                                                                                              |
| (+)-Butaclamol (i.p.) before PRE-084 substitution for <i>d</i> -methamphetamine self-administration | F <sub>4,60</sub> =5.36; p=0.004 | F <sub>3,60</sub> =2.99; p=0.064 | F <sub>12,60</sub> =3.12; p=0.002  | 10 µg/kg (i.p.) at 0.1 mg/kg/inj, t=5.04, p<0.001<br>32 µg/kg (i.p.) at 0.32 mg/kg/inj, t=3.06, p=0.019<br>100 µg/kg (i.p.) at 0.32 mg/kg/inj, t=3.76, p=0.002                                                                                                                                                                                                                                                                                                                        |
| BD 1008 (i.p.) before PRE-084 substitution for <i>d</i> -methamphetamine self-administration        | F <sub>4,60</sub> =6.24; p=0.002 | F <sub>3,60</sub> =5.82; p=0.008 | F <sub>12,60</sub> =4.77; p<0.001  | 10 mg/kg (i.p.) at 0.1 mg/kg/inj, t=3.29, p=0.010, 3.2 mg/kg (i.p.) at 0.32 mg/kg/inj, t=4.39, p<0.001, 10 mg/kg (i.p.) at 0.32 mg/kg/inj, t=5.60, p<0.001                                                                                                                                                                                                                                                                                                                            |

|                                                                                                 |                                      |                                      |                                       |                                                                                                                                                                                                                                                                                                                                                                                                                                                                                                         |
|-------------------------------------------------------------------------------------------------|--------------------------------------|--------------------------------------|---------------------------------------|---------------------------------------------------------------------------------------------------------------------------------------------------------------------------------------------------------------------------------------------------------------------------------------------------------------------------------------------------------------------------------------------------------------------------------------------------------------------------------------------------------|
| Naltrexone (i.p.) before PRE-084 substitution for <i>d</i> -methamphetamine self-administration | F <sub>4,60</sub> =5.55;<br>p=0.004  | F <sub>3,60</sub> =3.45;<br>p=0.044  | F <sub>12,60</sub> =3.50;<br>p<0.0001 | 1.0 mg/kg (i.p.) at 0.1 mg/kg/inj, t=5.78, p<0.001<br>3.2 mg/kg (i.p.) at 0.1 mg/kg/inj, t=3.54, p=0.005<br>10 mg/kg (i.p.) at 0.1 mg/kg/inj, t=5.78, p<0.001<br>1.0 mg/kg (i.p.) at 0.32 mg/kg/inj, t=3.56, p=0.004                                                                                                                                                                                                                                                                                    |
| (+)-Butaclamol (i.p.) before heroin self-administration                                         | F <sub>4,100</sub> =30.4;<br>p<0.001 | F <sub>5,100</sub> =6.57;<br>p<0.001 | F <sub>20,100</sub> =4.24;<br>p<0.001 | 1.0 µg/kg (i.p.) at 3.2 µg/kg/inj, t=4.23, p=0.001<br>3.2 µg/kg (i.p.) at 10 µg/kg/inj, t=5.75, p<0.001                                                                                                                                                                                                                                                                                                                                                                                                 |
| BD 1008 (i.p.) before heroin self-administration                                                | F <sub>4,80</sub> =32.7;<br>p<0.001  | F <sub>4,80</sub> =3.27;<br>p=0.033  | F <sub>16,80</sub> =0.855;<br>p=0.621 | N.S. (vs. Vehicle, i.p.)                                                                                                                                                                                                                                                                                                                                                                                                                                                                                |
| Naltrexone (i.p.) before heroin self-administration                                             | F <sub>4,80</sub> =32.9;<br>p<0.001  | F <sub>4,80</sub> =26.3;<br>p<0.001  | F <sub>16,80</sub> =32.9;<br>p<0.001  | 0.32 µg/kg (i.p.) at 3.2 µg/kg/inj, t=7.72, p<0.001,<br>1.0 µg/kg (i.p.) at 3.2 µg/kg/inj, t=7.88, p<0.001,<br>3.2 µg/kg (i.p.) at 3.2 µg/kg/inj, t=7.24, p<0.001,<br>0.32 µg/kg (i.p.) at 10 µg/kg/inj, t=3.07, p=0.028,<br>1.0 µg/kg (i.p.) at 10 µg/kg/inj, t=10.8, p<0.001,<br>3.2 µg/kg (i.p.) at 10 µg/kg/inj, t=10.8, p<0.001,<br>0.32 µg/kg (i.p.) at 32 µg/kg/inj, t=9.75, p<0.001,<br>1.0 µg/kg (i.p.) at 32 µg/kg/inj, t=8.44, p<0.001,<br>3.2 µg/kg (i.p.) at 32 µg/kg/inj, t=2.89, p=0.047 |
| (+)-Butaclamol (i.p.) before ketamine self-administration                                       | F <sub>4,100</sub> =12.5;<br>p<0.001 | F <sub>5,100</sub> =6.83;<br>p<0.001 | F <sub>20,100</sub> =6.68;<br>p<0.001 | 1.0 µg/kg (i.p.) at 0.1 mg/kg/inj, t=3.90, p=0.002<br>1.0 µg/kg (i.p.) at 0.32 mg/kg/inj, t=6.36, p<0.001<br>32 µg/kg (i.p.) at 0.32 mg/kg/inj, t=3.11, p=0.035<br>100 µg/kg (i.p.) at 0.32 mg/kg/inj, t=3.23, p=0.024                                                                                                                                                                                                                                                                                  |
| BD 1008 (i.p.) before ketamine self-administration                                              | F <sub>4,80</sub> =12.5;<br>p<0.001  | F <sub>4,80</sub> =5.85;<br>p=0.003  | F <sub>16,80</sub> =5.47;<br>p<0.001  | 1.0 mg/kg (i.p.) at 0.32 mg/kg/inj, t=5.90, p<0.001,<br>3.2 mg/kg (i.p.) at 0.32 mg/kg/inj, t=3.27, p=0.015,<br>32 mg/kg (i.p.) at 0.32 mg/kg/inj, t=3.28, p=0.015                                                                                                                                                                                                                                                                                                                                      |
| Naltrexone (i.p.) before ketamine self-administration                                           | F <sub>4,100</sub> =11.3;<br>p<0.001 | F <sub>5,100</sub> =5.74;<br>p=0.001 | F <sub>20,100</sub> =4.75;<br>p<0.001 | 3.2 mg/kg (i.p.) at 0.32 mg/kg/inj, t=8.85, p<0.001                                                                                                                                                                                                                                                                                                                                                                                                                                                     |

N.S.: non-significant
